# Supplementary material for: Increased Hippocampal Blood Flow in People at Clinical High Risk for Psychosis and Effects of Cannabidiol
Source: bioRxiv or medRxiv preprint supplement (doi:10.1101/2023.02.22.23286306), 2023-08-22
Supplement: Supplementary file [file media-1.pdf]

# **Acute Effects of Cannabidiol on Hippocampal Blood Flow in People at Clinical High Risk for Psychosis**

Cathy Davies, Matthijs G Bossong, Daniel Martins, Robin Wilson, Elizabeth Appiah-Kusi, Grace Blest-Hopley, Fernando Zelaya, Paul Allen, Michael Brammer, Jesus Perez, Philip McGuire, Sagnik Bhattacharyya

## **SUPPLEMENTARY MATERIAL**

### **Supplementary Introduction**

- Fig S1. Schematic of neural circuit mechanisms of hippocampal dysfunction in the pathophysiology underlying psychosis onset

### **Supplementary Methods**

- MRI Acquisition
- MRI Processing
- SPM Thresholds

### **Supplementary Results**

- CONSORT Details
- Fig S2. CONSORT Flow Diagram
- Fig S3. CBD Plasma Levels

### **Supplementary References**

**FIGURE S1. Schematic of proposed neural circuit mechanisms of hippocampal dysfunction in the pathophysiology underlying psychosis onset.** In (1), low glutamate signal/input from hypofunctioning NMDARs (akin to faulty homeostatic sensors) prompts GABAergic interneurons to homeostatically increase excitation by reducing inhibition (disinhibition) of glutamatergic pyramidal cells. However, by disinhibiting pyramidal cells (and thus increasing glutamate signalling) in this dysfunctional neural environment, the potential homeostatic adaptation becomes allostatic, with enhanced excitatory drive inducing (2) hypermetabolism and hyperperfusion (elevated blood flow to meet increased metabolic demand), and (3) an overdrive in the responsivity of midbrain dopamine neurons, which project to the associative striatum. Note that the connection between hippocampal pyramidal cells and midbrain dopamine neurons is presented as monosynaptic but is in fact polysynaptic via the ventral striatum and ventral pallidum. Completing the (simplified) circuit, local glutamatergic tone is increased in (4) but is not detected as such by hypofunctioning NMDARs on GABAergic interneurons. Figure reproduced and adapted with permission (CCBY 4.0) from (Davies *et al.*, 2019). For original diagrams and discussion of evidence for this proposed circuit, see (Lisman *et al.*, 2008; Krystal and Anticevic, 2015; Modinos *et al.*, 2015; Krystal *et al.*, 2017; Lieberman *et al.*, 2018). *Abbreviations:* Glu, glutamate; NMDAR, N-methyl-D-aspartate receptor; CA1, Cornu Ammonis 1.

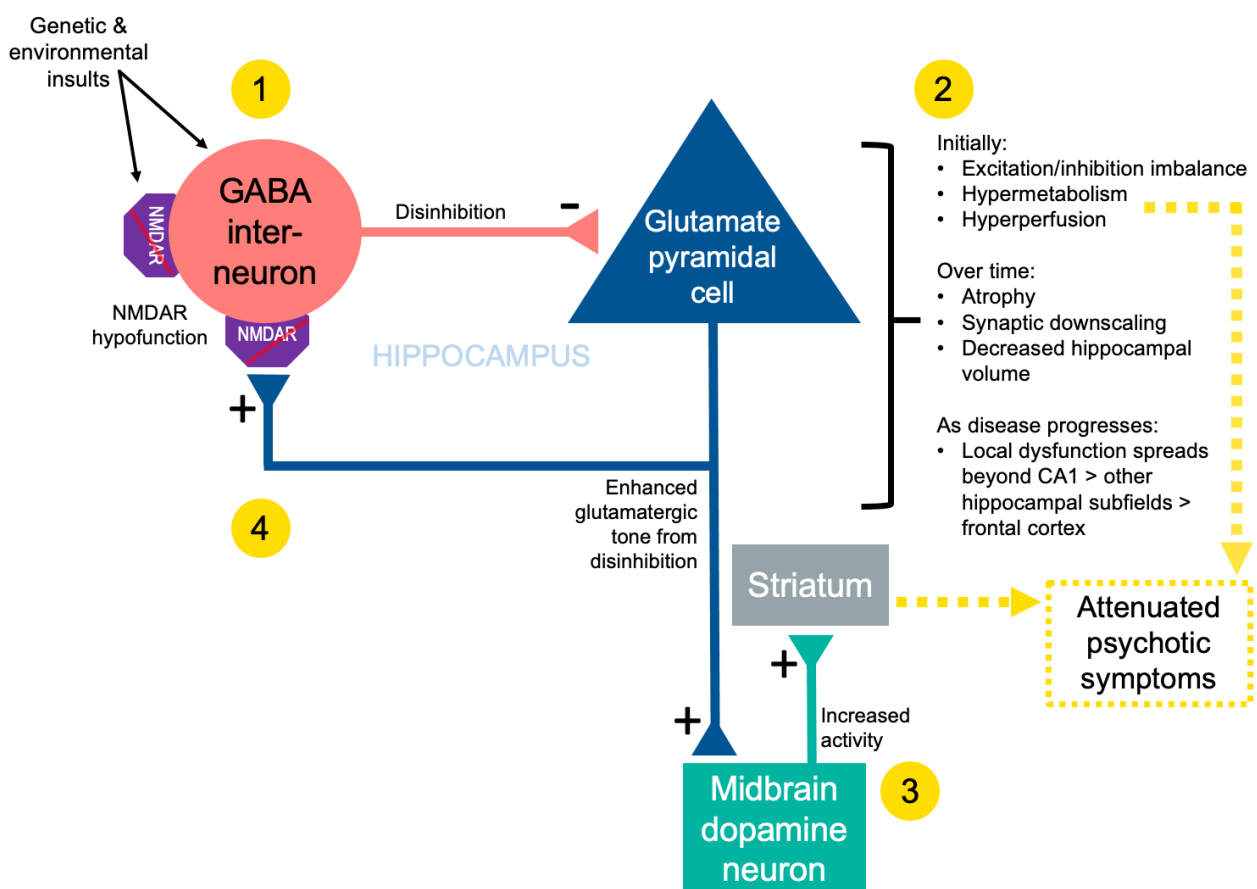

## Supplementary Methods – MRI Acquisition and Image Processing

### *Image Acquisition*

All scans were acquired (eyes-open) on a General Electric Signa HDx 3T MR system with an 8-channel coil at the Institute of Psychiatry, Psychology and Neuroscience, King's College London. For image registration both a high resolution T2-weighted Fast Spin Echo (FSE) image (TE= 54.58ms, TR= 4380ms, Flip angle= 90deg, FoV= 240, Matrix size= 320 x 320, slice thickness= 2mm, 72 spatial locations) and a high-resolution T1-weighted Spoiled Gradient Recalled (SPGR) image (TE= 2.85ms, TR= 6.98ms, Flip angle= 11deg, FoV= 260, Matrix size= 256 x 256, slice thickness= 1.2mm, 196 spatial locations) were acquired.

Resting Cerebral Blood Flow (CBF) was measured using 3D pseudo-Continuous Arterial Spin Labelling (CASL) scans acquired with a 3D Fast Spin Echo (FSE) spiral multi-shot readout, following a post-labelling delay of 1.5s. The spiral acquisition used a short (10ms) TE, and 8 spiral arms (interleaves) with 512 points in each arm. FSE TE= 32.26ms, TR = 5500ms. 64 slices of 3mm thickness were obtained and the in-plane FoV was 240×240mm. Three pairs of tagged-untagged images were collected. The whole ASL pulse sequence, including the acquisition of calibration images, was performed in 6:08min.

### *Image Processing*

Data were preprocessed using FMRIB Software Library (FSL) 6.0.2 using the following procedure: (1) T1 and T2 images were skull-stripped and corresponding brain-only binary masks created; (2) original CBF images were coregistered to the T2 images and (3) multiplied by the binary T2 mask to create a skull-stripped CBF image in T2 space; (4) skull-stripped T2 was coregistered to skull-stripped T1; (5) skull-stripped T1 was first linearly coregistered to the MNI152 T1 2mm brain template, before non-linear registration (FNIRT) of the original T1 to MNI space; (6) original T2 images were registered to the MNI template (via T1 space) in a single concatenated step, using the T2-to-T1 transformation matrix (from step 4) and T1-to-MNI warp (from step 5); (7) skull-stripped CBF images (already in T2 space) were registered to the MNI template using the concatenated procedure in step 6; (8) normalised CBF images were spatially smoothed with a 6mm Gaussian kernel. The final voxel size was 2 x 2 x 2 mm. All images were visually inspected for preprocessing errors.

### *Statistical Thresholds in SPM*

Statistical thresholds for exploratory wholebrain analyses (cluster-forming threshold:  $p < .005$ ; cluster reported as significant at  $p < .05$  using FWE cluster correction in SPM) were determined *a priori* based on previous work at our Institute investigating the effects of potential novel

pharmacotherapies on rCBF in humans (Paloyelis *et al.*, 2016; Martins *et al.*, 2020b, 2022), including in our previous work in CHR patients (Davies *et al.*, 2019), and are standardly applied in ASL studies measuring rCBF (Joe *et al.*, 2006; Takeuchi *et al.*, 2011; Loggia *et al.*, 2013; Mutsaerts *et al.*, 2019; Martins *et al.*, 2020a; Nwokolo *et al.*, 2020).

## Supplementary Results

### CONSORT Details

The study was registered (ISRCTN46322781): <https://doi.org/10.1186/ISRCTN46322781>. Further details required for adherence to CONSORT (including recruitment periods, power calculations, randomisation and further blinding details, etc) can be found in the Supplementary Material of our previous publication in the same sample, where the study protocol is also appended (Bhattacharyya *et al.*, 2018).

**FIGURE S2. CONSORT Flow Diagram (CHR patients)**

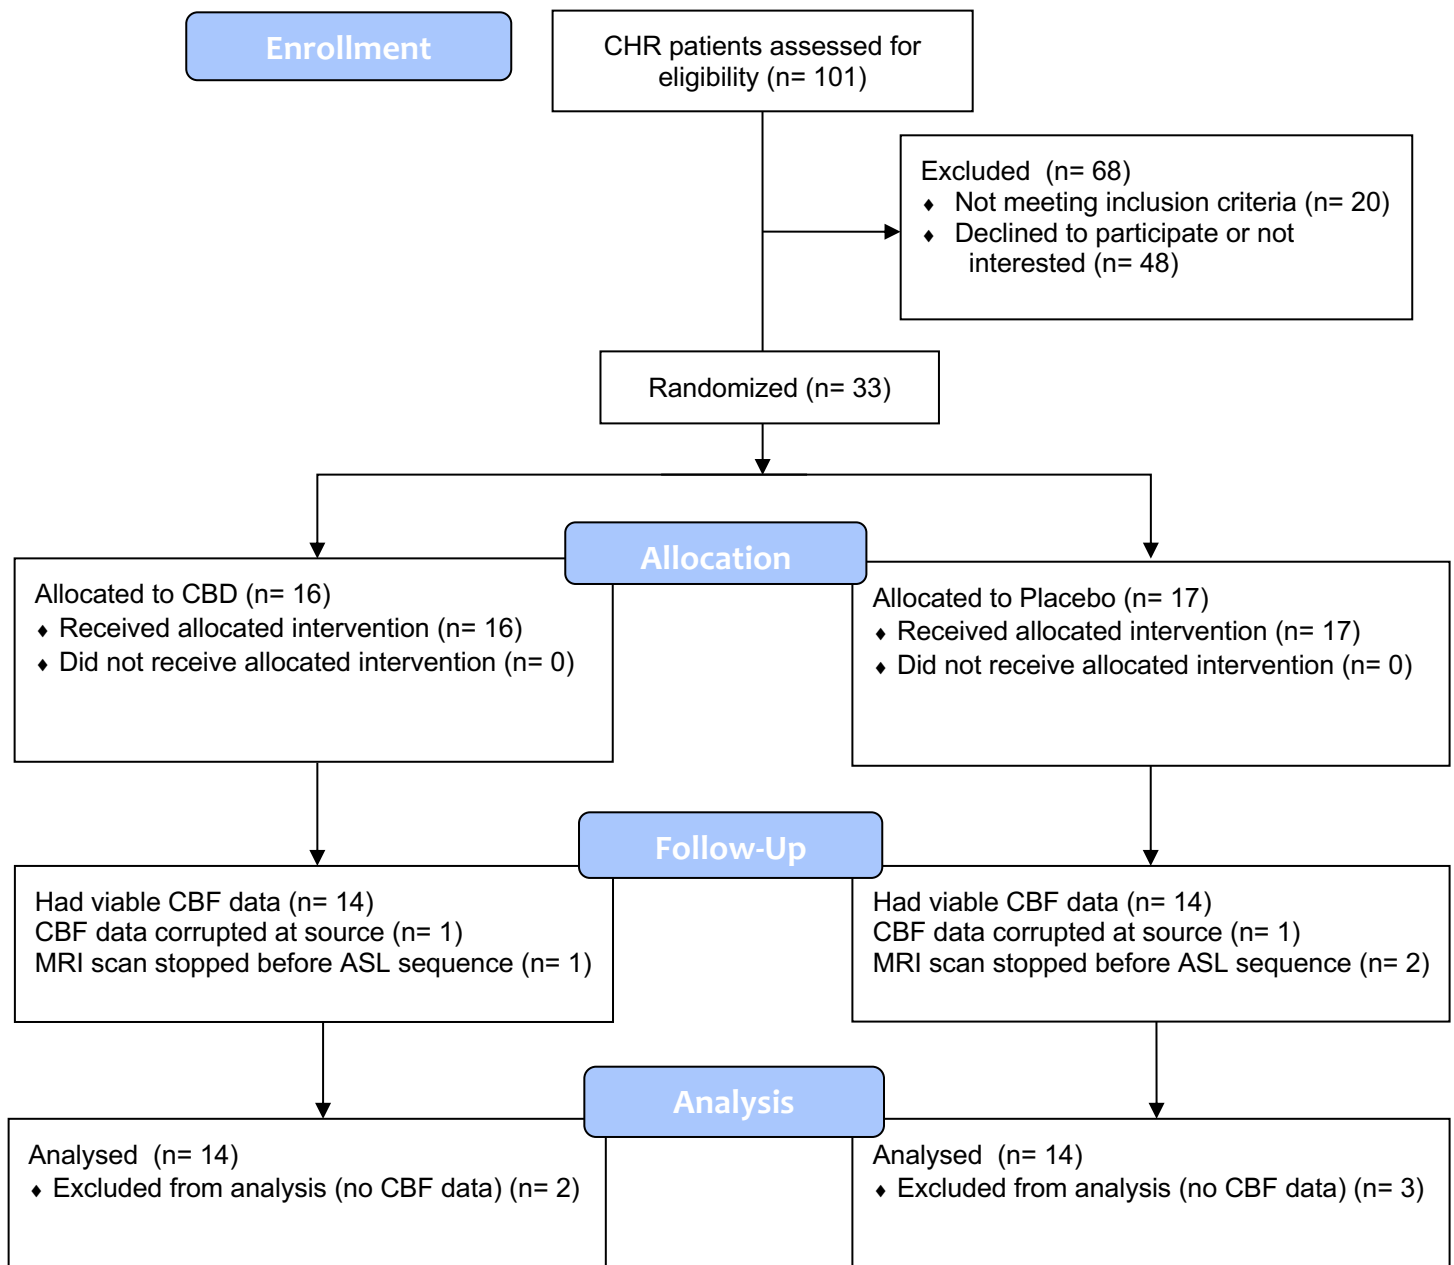

FIGURE S3. Plot showing CBD plasma levels in CHR placebo and CBD groups

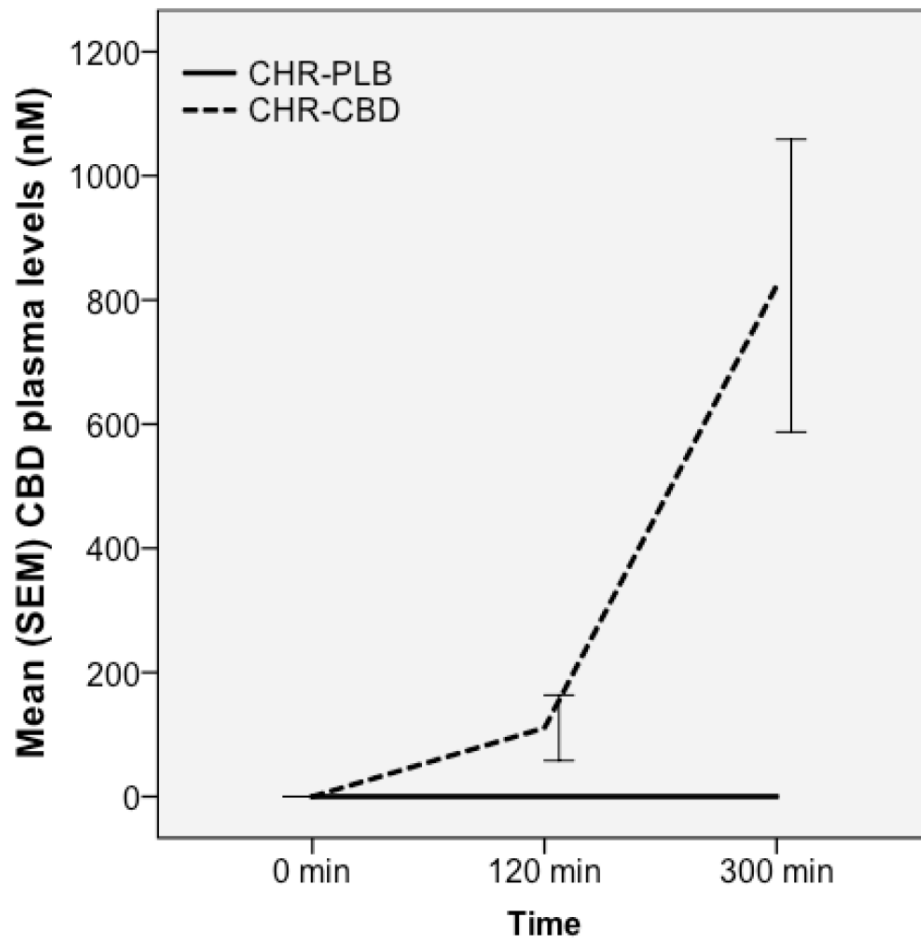

## REFERENCES

- Bhattacharyya S, Wilson R, Appiah-Kusi E, O'Neill A, Brammer M, Perez J, Murray R, Allen P, Bossong MG, McGuire P (2018) Effect of Cannabidiol on Medial Temporal, Midbrain, and Striatal Dysfunction in People at Clinical High Risk of Psychosis: A Randomized Clinical Trial. *JAMA Psychiatry* 75, 1107–1117.
- Davies C, Paloyelis Y, Rutigliano G, Cappucciati M, De Micheli A, Ramella-Cravaro V, Provenzani U, Antoniadou M, Modinos G, Oliver D, Stahl D, Murguia S, Zelaya F, Allen P, Shergill S, Morrison P, Williams S, Taylor D, McGuire P, Fusar-Poli P (2019) Oxytocin modulates hippocampal perfusion in people at clinical high risk for psychosis. *Neuropsychopharmacology* 44, 1300–1309.
- Joe AY, Tielmann T, Bucerius J, Reinhardt MJ, Palmedo H, Maier W, Biersack H-J, Zobel A (2006) Response-Dependent Differences in Regional Cerebral Blood Flow Changes with Citalopram in Treatment of Major Depression. Society of Nuclear Medicine *Journal of Nuclear Medicine* 47, 1319–1325.
- Krystal JH, Anticevic A (2015) Toward Illness Phase-Specific Pharmacotherapy for Schizophrenia. Elsevier *Biological Psychiatry* 78, 738–740.
- Krystal JH, Anticevic A, Yang GJ, Dragoi G, Driesen NR, Wang XJ, Murray JD (2017) Impaired Tuning of Neural Ensembles and the Pathophysiology of Schizophrenia: A Translational and Computational Neuroscience Perspective. Elsevier Inc. *Biological Psychiatry* 81, 874–885.
- Lieberman JA, Girgis RR, Brucato G, Moore H, Provenzano F, Kegeles L, Javitt D, Kantrowitz J, Wall MM, Corcoran CM, Schobel SA, Small SA (2018) Hippocampal dysfunction in the pathophysiology of schizophrenia: a selective review and hypothesis for early detection and intervention. Nature Publishing Group *Molecular Psychiatry* 23, 1764–1772.
- Lisman JE, Coyle JT, Green RW, Javitt DC, Benes FM, Heckers S, Grace A a. (2008) Circuit-based framework for understanding neurotransmitter and risk gene interactions in schizophrenia. *Trends in Neurosciences* 31, 234–242.
- Loggia ML, Kim J, Gollub RL, Vangel MG, Kirsch I, Kong J, Wasan AD, Napadow V (2013) Default mode network connectivity encodes clinical pain: An arterial spin labeling study. *PAIN* 154, 24–33.
- Martins D, Brodmann K, Veronese M, Dipasquale O, Mazibuko N, Schuschnig U, Zelaya F, Fotopoulou A, Paloyelis Y (2022) 'Less is more': A dose-response account of intranasal oxytocin pharmacodynamics in the human brain. Elsevier Ltd *Progress in Neurobiology* 211, 102239.
- Martins D, Leslie M, Rodan S, Zelaya F, Treasure J, Paloyelis Y (2020a) Investigating resting brain perfusion abnormalities and disease target-engagement by intranasal oxytocin in women with bulimia nervosa and binge-eating disorder and healthy controls. Springer US *Translational Psychiatry*.
- Martins DA, Mazibuko N, Zelaya F, Vasilakopoulou S, Loveridge J, Oates A, Maltezos S, Mehta M, Wastling S, Howard M, McAlonan G, Murphy D, Williams SCR, Fotopoulou A, Schuschnig U, Paloyelis Y (2020b) Effects of route of administration on oxytocin-induced changes in regional cerebral blood flow in humans. Springer US *Nature Communications* 11, 1–16.

- Modinos G, Allen P, Grace AA, McGuire P (2015) Translating the MAM model of psychosis to humans. *Trends in Neurosciences* 38, 129–138.
- Mutsaerts HJMM, Mirza SS, Petr J, Thomas DL, Cash DM, Bocchetta M, de Vita E, Metcalfe AWS, Shirzadi Z, Robertson AD, Tartaglia MC, Mitchell SB, Black SE, Freedman M, Tang-Wai D, Keren R, Rogaeva E, van Swieten J, Laforce R Jr, Tagliavini F, Borroni B, Galimberti D, Rowe JB, Graff C, Frisoni GB, Finger E, Sorbi S, de Mendonça A, Rohrer JD, MacIntosh BJ, Masellis M, GENetic Frontotemporal dementia Initiative (GENFI) (2019) Cerebral perfusion changes in presymptomatic genetic frontotemporal dementia: a GENFI study. *Brain* 142, 1108–1120.
- Nwokolo M, Amiel SA, O'Daly O, Byrne ML, Wilson BM, Pernet A, Cordon SM, Macdonald IA, Zelaya FO, Choudhary P (2020) Hypoglycemic thalamic activation in type 1 diabetes is associated with preserved symptoms despite reduced epinephrine. SAGE Publications Ltd *STM Journal of Cerebral Blood Flow & Metabolism* 40, 787–798.
- Paloyelis Y, Doyle OM, Zelaya FO, Maltezos S, Williams SC, Fotopoulou A, Howard MA (2016) A Spatiotemporal Profile of In Vivo Cerebral Blood Flow Changes Following Intranasal Oxytocin in Humans. Elsevier *Biological Psychiatry* 79, 693–705.
- Takeuchi H, Taki Y, Hashizume H, Sassa Y, Nagase T, Nouchi R, Kawashima R (2011) Cerebral Blood Flow during Rest Associates with General Intelligence and Creativity. Public Library of Science *PLOS ONE* 6, e25532.
